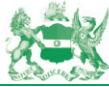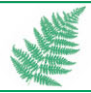

# Resolving the unresolved tribe: a molecular phylogenetic framework for the Merremieae (Convolvulaceae)

ANA RITA SIMOES<sup>1,2\*</sup>, ALASTAIR CULHAM<sup>2</sup> and MARK CARINE<sup>1</sup>

<sup>1</sup>The Natural History Museum of London, Department of Life Sciences, Cromwell Road, SW7 5BD London, UK

<sup>2</sup>University of Reading, 101 Harbourne Building, Whiteknights, RG6 6AH Reading, Berkshire, UK

Received 31 March 2015; revised 13 June 2015; accepted for publication 11 August 2015

Tribe Merremieae, as currently circumscribed, comprise *c.* 120 species classified in seven genera, the largest of which (*Merremia*) is morphologically heterogeneous. Previous studies, with limited sampling, have suggested that neither Merremieae nor *Merremia* are monophyletic. In the present study, the monophyly of *Merremia* and its allied genera was re-assessed, sampling 57 species of Merremieae for the plastid *matK*, *trnL-trnF* and *rps16* regions and the nuclear internal transcribed spacer (ITS) region. All genera of Merremieae and all major morphotypes in *Merremia* were represented. Phylogenetic analyses resolve Merremieae in a clade with Ipomoeae, Convolvuleae and *Daustinia montana*. *Merremia* is confirmed as polyphyletic and a number of well-supported and morphologically distinct clades in Merremieae are recognized which accommodate most of the species in the tribe. These provide a framework for a generic revision of the assemblage. © 2015 The Linnean Society of London, *Botanical Journal of the Linnean Society*, 2015, 179, 374–387.

ADDITIONAL KEYWORDS: classification – *Merremia* – phylogenetics.

## INTRODUCTION

Convolvulaceae are species of climbers, herbs and shrubs (occasionally trees), with 58 genera and *c.* 1840 species, occurring in tropical and temperate regions (Brummit & Staples, 2007). They are usually recognized by their bell- to funnel- or salver-shaped sympetalous corollas with five conspicuous midpetaline bands. The inflorescence is often an axillary cyme and the fruit is typically a dehiscent four-seeded capsule, although other types of fruits may occur (Brummit & Staples, 2007); it is the only asterid family to have seeds showing physical dormancy (Jayasuriya *et al.*, 2009).

Molecular phylogenetic techniques have provided a means to clarify and stabilize tribal and generic classification in Convolvulaceae (e.g. Manos, Miller & Wilkin, 2001; Miller, Buckley & Manos, 2002; Stefanovic, Austin & Olmstead, 2003; Stefanovic &

Olmstead, 2004). Stefanovic, Krueger & Olmstead (2002) used evidence from four plastid regions (*rbcL*, *atpB*, *psbE-J* operon and *trnL-trnF*) to test the monophyly of the family, circumscribe the major lineages and, in a subsequent study (Stefanovic *et al.*, 2003), establish hypotheses for tribal and generic delimitation based on the criterion of monophyly. Convolvulaceae were found to be monophyletic and taxa which had previously been suggested as distinct from the family (e.g. *Humbertia* Lam. and *Cuscuta* L.) were included in it. Two major lineages were identified and the family was consequently divided into two subfamilies: Convolvuloideae and Humbertioideae.

In the most recent tribal classification of the family (Brummit & Staples, 2007), Merremieae were one of 12 tribes recognized in subfamily Convolvuloideae. Brummit & Staples (2007) included seven genera in the tribe: the pantropical genera *Merremia* Dennst. ex. Endl. (*c.* 100 species), *Operculina* Silva Manso (14 species) and *Xenostegia* D.F. Austin & Staples (two species), the East African endemic *Hyalocystis* Hallier f. (two species), *Hewittia* Wight & Arn. (distributed in

\*Corresponding author. E-mail: simoes.ana.convvolv@gmail.com

East Africa and Asia, two species) and the monotypic genera *Decalobanthus* Ooststr. (endemic to Sumatra) and *Remirema* Kerr (endemic to Thailand). A further genus in Merremieae was more recently described by Johnson (2010) who separated *Davenportia* Johnson from *Merremia* as a monotypic Australian endemic genus.

Of the tribes in Convolvulaceae, Merremieae remain the least well defined. The tribe was first recognized informally by Austin (1982), as the 'merremioids', a group in which he included *Aniseia* Choisy, *Hewittia*, *Merremia*, *Operculina* and *Tetralocularia* O'Donell. The tribe was described as similar to tribe Convolvuleae, but differing in the form of the sepals, the glabrous corollas and the capsule, though exceptions to these morphological traits were known to exist in *Hewittia*, which has a pubescent capsule, and some species of *Operculina* and *Merremia*, which have pubescent corollas. Austin (1998) subsequently broadened the concept of the group to include *Decalobanthus*, *Hyalocystis* and *Xenostegia* and *Iseia* O'Donell and *Odonellia* K.R. Robertson, although the results of the morphological cladistics analysis he presented suggested that Merremieae were not monophyletic.

The tribe was first recognized formally (albeit tentatively) in the molecular-based classification of the family by Stefanovic *et al.* (2003). The molecular phylogenetic study of Stefanovic *et al.* (2002) suggested that the 'merremioids' of Austin (1982) were polyphyletic. As a consequence four genera (*Aniseia*, *Iseia*, *Odonellia*, *Tetralocularia*) were placed in a newly defined monophyletic tribe Aniseieae. The relationships between the remaining genera of Merremieae were largely unresolved. Moreover, deeper nodes in the phylogenetic tree of Stefanovic *et al.* (2002) were weakly supported, only half of the genera in Merremieae as currently circumscribed were included and no defining characters for the tribe were found. The tribal concept was maintained as it was in the morphology-based classification of the family (Austin, 1998), possibly for lack of evidence to make significant changes, but the group was flagged as problematic and in need of further work.

At the generic level, the circumscription of the largest genus, *Merremia*, has long been problematic. Stefanović (2002) included only five of the 101 *Merremia* spp., but found it to be polyphyletic, albeit with weak support at deeper nodes. Sampling of other genera to date has been extremely limited. Thus, only two of the 14 *Operculina* spp. were sampled by Stefanovic *et al.* (2002), *Xenostegia* and *Hewittia* were each represented by a single species (out of two in each case) and *Hyalocystis* two species), *Decalobanthus* and *Remirema* were not sampled. The relationships of *Davenportia* have also yet not been investigated.

A recent revision of *Jacquemontia* Choisy provided evidence that *J. montana* Meisn., a Brazilian endemic, did not fit the traditional circumscription of the genus but was instead morphologically close to *Merremia* s.l. with which it shared simple trichomes, tricolpate non-spiny pollen, a biglobular stigma and yellow flowers (Buril, 2013). However, the entire simple serrate leaves and capitate inflorescences make it distinct from the *Merremia* spp. occurring in Brazil and it has been recognized as a distinct genus *Daustinia* Buril & A.R. Simões (Buril, 2013; Buril *et al.*, 2014, 2015).

In summary, the current members of Merremieae show a range of conflicting morphological evidence, some supporting, and some refuting, the group. In addition, the molecular evidence produced to date has been limited in taxon sampling and resolution.

The aim of this paper is to establish a molecular phylogenetic framework that will serve as a basis for a revised classification of Merremieae. Sampling broadly across the tribe and utilizing data from the plastid *matK*, *trnL-trnF* and *rps16* regions and the nuclear ribosomal internal transcribed spacer (ITS) region, we aim to: (1) test the monophyly of *Merremia*; (2) test the monophyly and resolve the relationships of its allied genera; and (3) resolve the placement of *Daustinia*.

## MATERIAL AND METHODS

### MORPHOLOGICAL OBSERVATIONS

A working list of accepted species names to be considered in the molecular phylogenetic analyses was first produced, based on a thorough literature review of taxonomic accounts, namely: Van Ooststroom & Hoogland (1953; Malesian region), Fang & Staples (1995, China), Austin & Staples (unpublished, Neotropics), Heine (1963, *Flora of West Tropical Africa*), Gonçalves (1987, south-central Africa), Verdcourt (1963, *Flora of Tropical East Africa*), Meeuse & Welman (2000, South Africa), Thulin (2006, Somalia), Staples (2010, Thailand), Staples (2010, Asia, Pacific and Australia), Johnson (2009, Australia), Demissew, 2001 (Horn of Africa) and O'Donell (1941, tropical America). Thorough morphological observations were conducted, based on herbarium specimens from the following herbaria: A, AIGH, BCU, BK, BKF, BM, BR, E, COI, K, KEP, G, L, LISC, M, MICH, MEXU, MO, NY, PNH, SAN, SING and SAR, complemented with observations from fieldwork in Singapore, Thailand and Cambodia (2009), Ethiopia (2011) and Sumatra (2012), and information from the abovementioned taxonomic accounts. A wide range of characters was observed, from general vegetative and floral morphology to palynology. These data (Table 2) were taken

into account when interpreting the obtained phylogenetic relationships.

#### TAXON SAMPLING

Samples were obtained from silica gel-dried material collected in Thailand, Cambodia, West Sumatra and Singapore and herbarium specimens from BM, BRI, ETH, L, MO, SAN and SING. Also, samples were collected from plants in cultivation at the Collection Nationale des Convolvulacées (Hauts-de-Seine, France), the largest living collection of Convolvulaceae in the world. For voucher information see Appendix. Fifty-seven taxa of Merremieae were sampled, corresponding to 74 accessions covering all eight genera and the main morphological groups in *Merremia* as proposed by Staples (2010). A further 56 samples were included as outgroup taxa representative of tribes Ipomoeae, Aniseieae and Convolvuleae and four species from three genera in the more distantly related 'bifid-style' clade: *Cladostigma* Radlk., *Hildebrandtia* Vatke and *Seddera* Hochst.

#### DNA EXTRACTION, AMPLIFICATION AND SEQUENCING

Total genomic DNA was extracted from approximately 0.1 g of dried leaf material (silica gel-dried or herbarium specimens) using a modification of the CTAB micro-extraction method (Doyle & Doyle, 1987), in which the aqueous phase from the chloroform precipitation was cleaned using Qiagen DNeasy kit and protocol (Carine *et al.*, 2004). Plastid DNA barcoding region *matK* (matk390f-matK1326r) was amplified using PCR conditions as described in Hollingsworth *et al.* (2009). The plastid *rps16* [rps16x2F2-trnK(UUU)] and *trnL-trnF* (c and f) regions were amplified using PCR cycling conditions described in Shaw *et al.* (2007). The ITS region of nuclear ribosomal DNA (AB101-AB102) was amplified with betaine (1.2 mol L<sup>-1</sup>) added to prevent the formation of secondary structures, following the protocol of Carine *et al.* (2004). Sequencing followed the Sanger dideoxy sequencing method, and was conducted by the Wellcome Trust sequencing laboratories at the Natural History Museum of London. Complimentary strands were assembled in Lasergene SeqMan (DNASTAR, Madison, Wisconsin, USA) and successfully assembled sequences were aligned by loci, finally concatenated, in BioEdit v7.1.3. (Hall, 1999).

Some sequences of *Convolvulus* (accession numbers KC528819, KC529015, KC528906, KC529150, KC528870, KC529131, KC528899, KC529121, KC528902, KC529133, KC528951, KC529028, Appendix) were generated by Miss Bethany Williams (University of Oxford). Sequences of *Daustinia montana*

(Moric.) Buril & A.R. Simões were generated by Dr Buril for her Doctoral thesis (Buril, 2013) and are as yet unpublished.

#### PHYLOGENETIC ANALYSES

Parsimony analyses were carried out using PAUP\* 4.0b10 software (Swofford, 2001). Conflict between plastid and nrDNA data sets was initially evaluated by running an ILD test (Farris *et al.*, 1994) which showed no significant incongruence between the data sets ( $P = 0.010000$ ). For further reassurance that there were no major conflicts, a quick heuristic search was conducted for each region and the topologies of the best trees compared. For this, parsimony analyses of individual matrices were run with 10 000 heuristic search replicates, saving two trees per replicate, random sequence addition and tree bisection reconnection (TBR) branch swapping. Support for clades was estimated by bootstrapping (Felsenstein, 1985) with 100 bootstrap replicates, each comprising 1000 heuristic search replicates using the setting detailed above. The resulting trees were compared by visual inspection, looking for the presence of strongly supported yet conflicting topologies. No major conflicts were encountered, hence the datasets were combined. The matrices were concatenated using WinClada v.1.00.08 (Nixon, 2002) and the combined matrix was analysed using the same protocol. Maximum likelihood and Bayesian inference analyses were also performed on the concatenated dataset.

Maximum likelihood analyses (ML) were performed using RaxML-HPC2 on XSEDE via CIPRES portal (Miller, Pfeiffer & Schwartz, 2010). A random topology was used as a starting tree and general-time reversible (GTR) (Yang, 1994) mix model was applied (GTRCAT followed by GTRGAMMA) as recommended by Miller *et al.* (2010). Bootstrap support values were obtained with the rapid bootstrap algorithm, with 10 000 bootstrap replicates.

Bayesian phylogenetic inferences were performed using parallel (MPI) version of MrBayes version 3.1.2 (Ronquist & Huelsenbeck, 2003) compiled with the Intel C/C++ Compiler (ICC) and BEAGLE-lib (Ayres *et al.*, 2012). The GTR model (Yang, 1994) of DNA substitution, with rate variation among nucleotides following a discrete gamma distribution and assuming a portion of invariant sites (GTR + I + G), was selected as the best-fit by Akaike information criterion (AIC; Akaike, 1974) in modelgenerator v0.85 (Keane *et al.*, 2006). Two independent runs starting from random trees were carried out. The Metropolis-coupled Markov chain Monte Carlo algorithm was used with four simultaneous chains (one heated, three cold), set at  $6 \times 10^6$  generations and sampled every 250 generations. The analysis was run until the

two MCMC runs converged to stationary distribution, with the first 10% of trees being discarded as burn-in, as assessed by inspection of InL trace using Tracer v.1.5 (Rambaut & Drummond, 2009). An *allcompat* consensus of all postburn-in trees obtained in Bayesian inference was computed.

Levels of support obtained from the three different methodologies were mapped on the Bayesian Inference (BI) *allcompat* consensus tree, using the FigTree v.1.4 program (Rambaut, 2012).

## RESULTS

### SEQUENCE CHARACTERISTICS AND VARIATION

All accessions in the final combined matrix had data for at least two of the four markers sequenced (ITS, *rps16*, *matK*, *trnL-trnF*), except for *Hyalocystis viscosa* Hallier f. for which only the ITS region was successfully amplified and sequenced. A summary of the variation found and taxa represented in the final dataset are presented in Table 1. The combined data matrix comprised 1702 constant characters and 1100 variable characters of which 712 were potentially parsimony informative. GenBank accession numbers are provided in the Appendix.

### TREE TOPOLOGY

The MP analysis resulted in 1686 trees 3692 steps long. All three optimality criteria (MP, ML and BI) support the monophyly of a clade comprising Convolvuleae, Ipomoeae, Merremieae and *Daustinia montana* [Fig. 1; MP bootstrap (hereafter MP) = 98%; ML bootstrap (hereafter ML) = 97%; Bayesian posterior probability (hereafter PP) = 1.00]. Accessions of *D. montana* (Fig. 1, clade 1) were resolved as a monophyletic group, though with relatively weak support in MP, (MP = 91; ML = 100; PP = 1.00) that is sister to the tribe Ipomoeae (MP = 51; ML = 64; PP = 99).

## DISCUSSION

### LEVELS OF SUPPORT

In general, the three phylogenetic methods have presented concordant levels of support for the different

nodes. However, particular nodes showed high levels of support in ML and BI, with lower values for MP (Figs 1, 2). This is possibly due to the fact that the genes were analysed as a concatenated dataset and the possible discordance between the gene trees (plastid and nuclear) was not accounted for. Although in the overall phylogenetic tree obtained this is not a widespread issue, we acknowledge that further analyses could be conducted to improve this situation. New methods are being discussed to optimize phylogenetic methodologies which account, e.g. for incomplete lineage sorting and coalescence (Maddison & Knowles, 2006; Degnan & Rosenberg, 2009; Edwards, 2009); re-exploring the data in this light would probably help resolve the encountered discordance.

### MAIN RELATIONSHIPS

The two clades comprising taxa of Merremieae [Fig. 1, clade 2 (MP = 100; ML = 100; PP = 1.00) and clade 3 (MP = 89; ML = 84; PP = 1.00)] form a monophyletic group with Ipomoeae and *D. montana* (clade 1) (MP = 52; ML = 74, PP = 1.00). Clade 2 comprises twining or prostrate herbs, with entire shallowly lobed leaves, glabrous corollas, spirally dehiscent anthers and chartaceous four-valved capsules (Table 2). The taxa included in this clade are widespread in the Old World tropics, among which is the type species of *Merremia* [*M. hederacea* (Burm.f.) Hallier f.]. Clade 3 comprises the monotypic *Decalobanthus sumatranus* Ooststr. in a late branching position with four *Merremia* spp. All are large woody lianas with broad cordate leaves, corymbiform inflorescences, clavate pedicels, glabrous corollas, spirally dehiscent anthers and chartaceous four-valved capsules. *Decalobanthus sumatranus* was separated as a monotypic genus by Van Ooststroom on the basis of the ten-lobed corollas, but the results indicate that its distinction from other Southeast Asian species with similar morphology is unwarranted. The taxa in this clade occur in Southeast Asia and the Pacific (Table 2) and correspond broadly to *Merremia* section *Hailale* Hallier f. as described by Van Ooststroom & Hoogland (1953), in which they included *M. clemensiana* Ooststr., *M. korthalsiana*

**Table 1.** Taxon sampling and variation for each of the molecular markers used

|                                                   | <i>trnL-trnF</i> | <i>rps16</i> | <i>matK</i> | ITS | Combined dataset |
|---------------------------------------------------|------------------|--------------|-------------|-----|------------------|
| Aligned length                                    | 412              | 1006         | 773         | 611 | 2802             |
| Number of taxa                                    | 155              | 100          | 149         | 111 | 113              |
| Variable sites                                    | 159              | 375          | 358         | 374 | 1100             |
| Number of potentially parsimony informative sites | 77               | 212          | 246         | 303 | 712              |



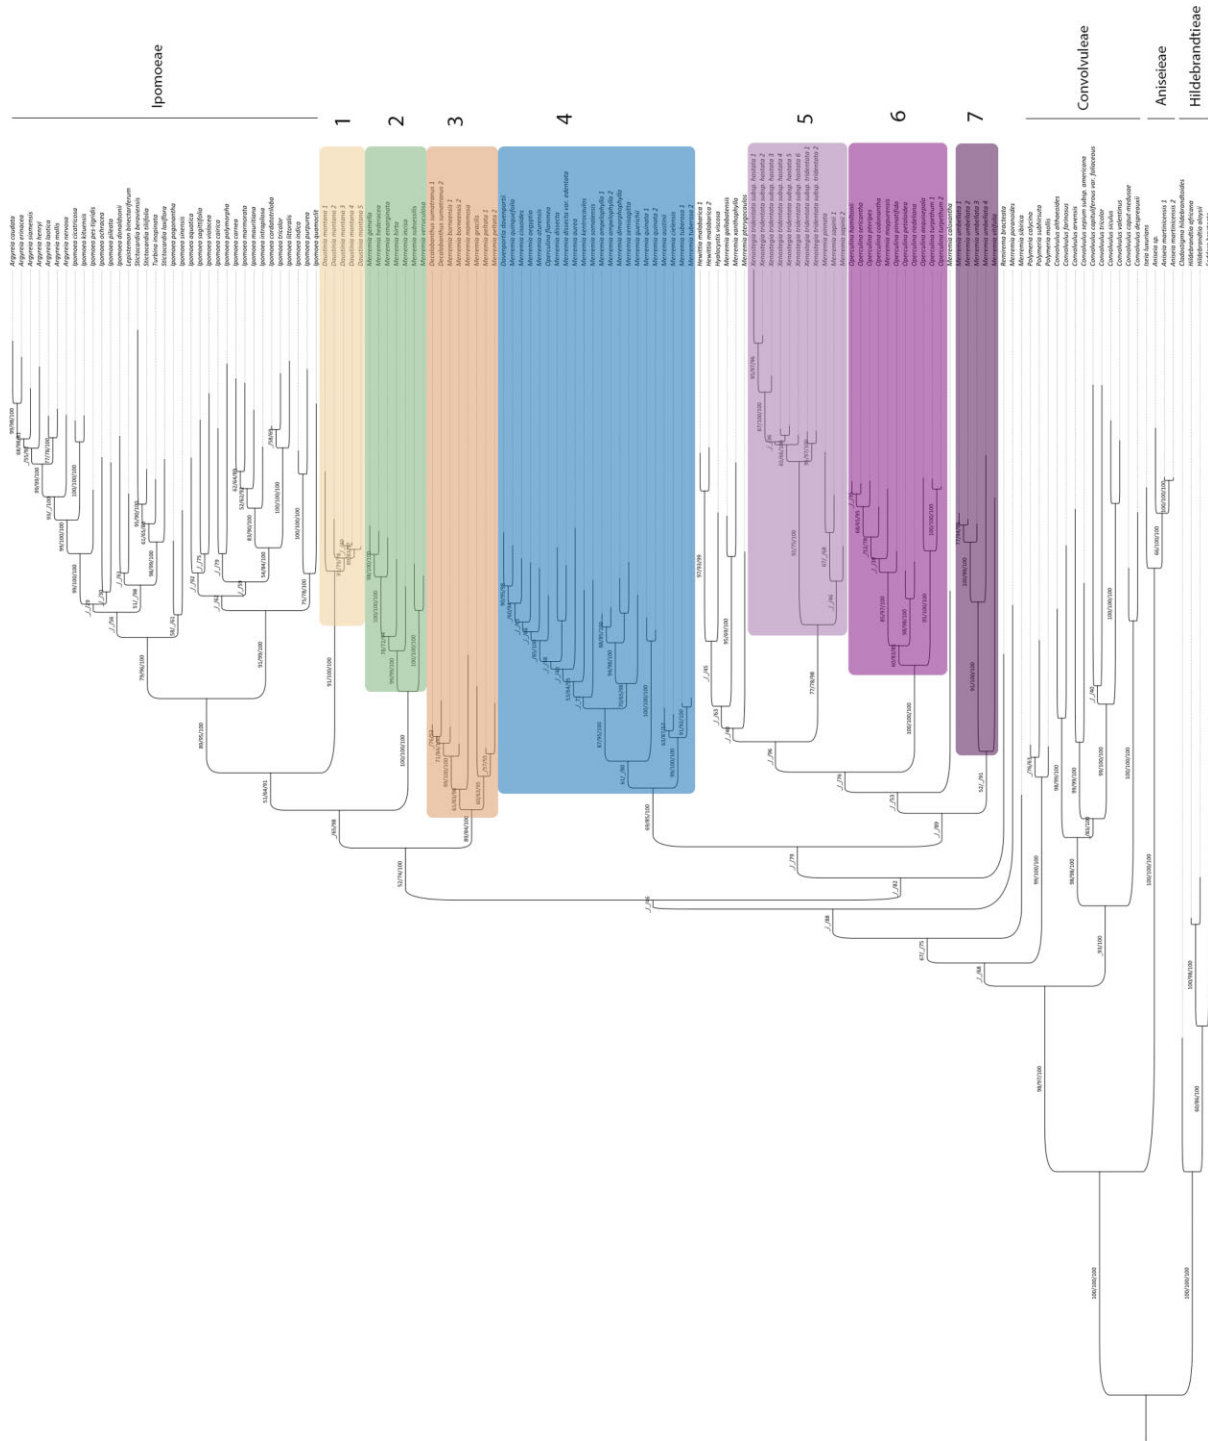

**Figure 2.** Phylogram depicting the phylogenetic relationships of tribes Ipomoeae, Merremieae, Convolvuleae and Aniseleae, based on four loci (*trnL-trnF*, *rps16*, *matK* and ITS) and reconstructed using Bayesian inference. Branch labels represent bootstrap per cent support in MP/ percent support in ML/Bayesian posterior probabilities. Nodes not present or with low support (< 50% bootstrap) in MP or ML analyses are indicated by the absence of support values. The tree is rooted on four taxa belonging to the bifid-style clade of Convolvulaceae (tribe Hildebrandtieae). Seven clades (1–7) are delimited by boxes and are discussed in the text.

**Table 2.** Composition, morphological characterization and distribution of clades supported under at least two of the three optimality criteria (Bayesian > 0.95, maximum likelihood and parsimony > 70%) in the combined analyses of *trnL-trnF*, *rps16*, *matK* and *ITS* (Fig. 1)

| Clade          | Species included                                                                                                                                                                                                                                                                                                                                                                                                                                                                                                                                                                                                                                                                                                                                                                                                                                                           | Morphological characteristics                                                                                                                                                                                                                                                                                                                                                        | Distribution                                                      |
|----------------|----------------------------------------------------------------------------------------------------------------------------------------------------------------------------------------------------------------------------------------------------------------------------------------------------------------------------------------------------------------------------------------------------------------------------------------------------------------------------------------------------------------------------------------------------------------------------------------------------------------------------------------------------------------------------------------------------------------------------------------------------------------------------------------------------------------------------------------------------------------------------|--------------------------------------------------------------------------------------------------------------------------------------------------------------------------------------------------------------------------------------------------------------------------------------------------------------------------------------------------------------------------------------|-------------------------------------------------------------------|
| <b>Clade 1</b> | <i>Daustinia montana</i> (Moric.) Buril & Simões                                                                                                                                                                                                                                                                                                                                                                                                                                                                                                                                                                                                                                                                                                                                                                                                                           | Erect subshrub, with subsessile leaves, bright yellow flowers, anthers spirally dehiscent and four-valved capsules; pollen tricolpate, non-spiny                                                                                                                                                                                                                                     | Endemic to Brazil                                                 |
| <b>Clade 2</b> | <i>Merremia emarginata</i> Hallier f.;<br><i>Merremia hederacea</i> Hallier f.;<br><i>Merremia gemella</i> (Choisy) Hallier f.;<br><i>Merremia hirta</i> (L.) Merrill;<br><i>Merremia incisa</i> (R.Br.) Hallier f.;<br><i>Merremia subsessilis</i> (Courchet & Gagnep.) T.N.Nguyen;<br><i>Merremia verruculosa</i> S.Y.Liu                                                                                                                                                                                                                                                                                                                                                                                                                                                                                                                                                | Twining or prostrate herbs, leaves entire to shallowly lobed; corolla completely glabrous; dark veins along the midpetaline bands; corolla lacking a maroon centre; anthers spirally dehiscent; fruit a chartaceous four-valved capsule, not delaminating when dehiscent                                                                                                             | Widespread in the Old World tropics                               |
| <b>Clade 3</b> | <i>Decalobanthus sumatranus</i> Ooststr.,<br><i>Merremia borneensis</i> Merrill,<br><i>Merremia mammosa</i> (Lour.) Hallier f.;<br><i>Merremia gracilis</i> E.J.F.Campbell & Argent;<br><i>Merremia peltata</i> (L.) Merrill                                                                                                                                                                                                                                                                                                                                                                                                                                                                                                                                                                                                                                               | Large climbing woody lianas with broad cordate leaves; inflorescence corymbiform; pedicel clavate; corolla glabrous; corolla without maroon centre; anthers spirally dehiscent; fruit a chartaceous four-valved capsule, delaminating when dehiscent; pollen trizonocolpate                                                                                                          | Widespread in SE Asia; also in the Pacific                        |
| <b>Clade 4</b> | <i>Davenportia davenportii</i> Johnson;<br><i>Merremia aegyptia</i> Urban;<br><i>Merremia ampelophylla</i> Hallier f.;<br><i>Merremia aturensis</i> Hallier f.;<br><i>Merremia aurea</i> (Kellogg) O'Donell;<br><i>Merremia austinii</i> J.A.McDonald;<br><i>Merremia cielenis</i> J.A.McDonald;<br><i>Merremia cissoidea</i> Hallier f.;<br><i>Merremia dissecta</i> Hallier f.;<br><i>Merremia dissecta</i> var. <i>edentata</i> (Meisn.) O'Donell;<br><i>Merremia dimorphophylla</i> (Verdc.) Sebsebe;<br><i>Merremia guericchii</i> A.Meeuse;<br><i>Merremia kentrocaulos</i> Rendle;<br><i>Merremia quinata</i> (R.Br.) Ooststr.;<br><i>Merremia quinquefolia</i> (L.) Hallier f.;<br><i>Merremia semisagitta</i> (Griseb. ex Peter) Dandy;<br><i>Merremia somalensis</i> Hallier f.;<br><i>Merremia tuberosa</i> Rendle;<br><i>Operculina flammea</i> (Nees) Meisner | Twining, robust climbers or rarely erect shrubs, with lobed or compound leaves (mostly five to seven lobes or leaflets), or rarely highly reduced leaves; flat calyx, with sepals adnate to the corolla; corolla with dark maroon centre, glabrous; anthers spirally twisting; fruit a chartaceous four-valved capsule; pollen trizonocolpate or 12-zonocolpate                      | Central and South America, Tropical Africa and Northern Australia |
| <b>Clade 5</b> | <i>Merremia pinnata</i> Hallier f.,<br><i>Merremia sapinii</i> De Wild.,<br><i>Xenostegia tridentata</i> (L.) D.F. Austin & Staples                                                                                                                                                                                                                                                                                                                                                                                                                                                                                                                                                                                                                                                                                                                                        | Slender twiners or prostrate herbs; stems angulate to narrowly winged; leaves basally dentate or hastate to pinnately lobed; sepals long acuminate or emarginate and mucronate, entire or pinnately incised; corolla yellow to white, glabrous; anthers longitudinally dehiscent; ovary densely pubescent; fruit four-valved chartaceous capsule; pollen pantoporate; seeds glabrous | Tropical Africa, South East Asia and Northern Australia           |
| <b>Clade 6</b> | <i>Operculina aequisepala</i> (Domin) R.W.Johnson;<br><i>Operculina codonantha</i> Hallier f.;<br><i>Operculina hamiltonii</i> (G.Don) D.F. Austin & Staples;<br><i>Operculina petaloidea</i> (Choisy) Ooststr.;<br><i>Operculina pinnatifida</i> (Kunth) O'Donell;<br><i>Operculina pteripes</i> (G. Don) O'Donell;<br><i>Operculina riedeliana</i> (Oliver) Ooststr.;<br><i>Operculina sericantha</i> (Miq.) Ooststr.;<br><i>Operculina turpethum</i> (L.) Silva Manso,<br><i>Merremia maypurensis</i> Hallier f.                                                                                                                                                                                                                                                                                                                                                        | Slender twiners, with an operculate fruit, leaves entire or lobed; corolla with pubescent midpetaline bands and lacking a maroon centre; pollen trizonocolpate                                                                                                                                                                                                                       |                                                                   |
| <b>Clade 7</b> | <i>Merremia umbellata</i> (L.) Hallier f.                                                                                                                                                                                                                                                                                                                                                                                                                                                                                                                                                                                                                                                                                                                                                                                                                                  | Herbaceous twiners or prostrate creepers; leaves entire; paired auricles below the leaf; corolla with a tuft of hairs at the apex of the midpetaline bands; anthers longitudinally dehiscent; fruit a chartaceous four-valved capsule, not delaminating when dehiscent; pollen hexazonocolpate                                                                                       | Widespread in the tropics                                         |

**Taxa not assigned to one of the clades above (see text for discussion):** *Merremia vitifolia*; *Hewittia malabarica*, *Hyaloyistis viscosa*, *M. gallabatensis*, *M. xanthophylla*; *M. pterygocaulos*; *M. caloxantha*, *M. sibirica*, *M. poranoides*, *Remirema bracteata*

Ooststr., *M. crassinervia* Ooststr., *M. borneensis* Merr., *M. elmeri* Merr., *M. peltata* Merr., *M. mammosa* (Lour.) Hallier f. and *M. boisiana* (Gagnep.) Ooststr.

Among the remaining taxa of Merremieae, four further well supported clades can be identified that, collectively, account for the majority of Merremieae sampled. Clade 4 (MP = 69, ML = 89, PP = 1.00) comprises the Australian endemic *Davenportia davenportii* (F.Muell) R.W.Johnson, *Operculina flammea* Meisn. and 17 *Merremia* spp. The members of this group occur in Central and South America, tropical Africa and northern Australia. They typically possess lobed or compound leaves (mostly five to seven lobes or leaflets), except *M. somalensis* Hallier f. and *M. aturensis* Hallier f., both of which have reduced leaves (Table 2). These species also share an erect habit and they are restricted to arid habitats. Their highly reduced leaves are likely an adaptation to these extreme conditions. *Davenportia davenportii* was separated as a monotypic genus by Johnson (2010) based on the presence of stellate hairs and hexazonocolpate and tricolpate pollen, but it is readily accommodated here as it shares the characters that define the group. *Operculina flammea* is included in this group and is the only *Operculina* sp. not resolved in clade 6. The operculate capsule is the defining character of *Operculina* and, significantly, the fruits of *O. flammea* are not known. All other members of this clade possess four-valved capsules and we hypothesize that this is also the case for *O. flammea*.

Clade 5 (MP = 77, ML = 78, PP = 0.98) comprises *Xenostegia* and the East African endemics *M. pinnata* Hallier f. and *M. sapinii* De Wild. *Xenostegia* has lobed to palmately divided leaves, whereas *M. sapinii* and *M. pinnata* have distinctly pinnately lobed leaves; nevertheless, they all possess panto-aperturate pollen and share a number of other significant characters (Table 2).

The strongly supported clade 6 (MP = 100, ML = 100, PP = 1.00) broadly corresponds to the traditional circumscription of *Operculina*. The fruit of *Merremia maypurensis* Hallier f., which was also resolved in this clade, is unknown and based on this result is likely to be an operculate capsule which is otherwise diagnostic of the clade (Table 2).

Finally, clade 7 (MP = 91, ML = 100, PP = 1.00) comprises *M. bambusetorum* Kerr and *M. umbellata* (L.) Hallier f. *Merremia vitifolia* Hallier f. is resolved as sister to this clade although with limited support (MP = 52, ML < 50, PP = 0.91). *Merremia bambusetorum*, *M. umbellata* and *M. vitifolia* all possess hexazonocolpate pollen (Simões, unpublished data). In other respects however, notably its five-lobed palmate leaves, flat calyx with sepals adnate to the completely glabrous corolla, spirally dehiscing anthers and papery, almost four-valved capsule, *M. vitifolia* is

morphologically closer to species in clade 4 (Table 2). The documented high levels of homoplasy in morphology of Convolvulaceae (Austin, 1998; Wilkin, 1999) could explain its morphological similarity with others in a distinct clade, although it should be noted that its placement is only weakly supported in the analysis and further data are necessary to resolve its relationships robustly.

Of the taxa of Merremieae not resolved in these clades, *Hewittia*, *Hyalocystis*, *M. gallabatensis* Hallier f., *M. xanthophylla* Hallier f. and *M. pterygocaulos* Hallier f. are resolved as a group in the Bayesian analysis that is sister to clade 5. It is notable that, with the exception of *Hewittia* that also occurs in Asia, all of these species are restricted to Africa, where clade 5, its putative but unsupported sister clade, is also most diverse. Although *Hewittia* can be easily distinguished by enlarged foliaceous bracts surrounding the calyx and *Hyalocystis* possesses a distinctive indehiscent fruit type, the group is morphologically heterogeneous and no diagnostic characters could otherwise be found to characterize it.

The placement of *M. caloxantha* (Diels) Staples & R.C.Fang, *M. sibirica* Hallier f., *M. poranoides* (C.B.Clarke) Hallier f. and *Remirema bracteata* Kerr is not clear. The Thai endemic *Remirema bracteata* has a gynobasic style and four-nutlet fruit type, otherwise unknown in the family. The remaining taxa are little-known species from China and Thailand, for which key morphological characters such as fruit and pollen types are still undocumented.

#### IMPLICATIONS FOR TRIBAL DELIMITATION

Stefanovic *et al.* (2002) found that Ipomoeae were nested in Merremieae, although their results lacked support and they were unable to reject the monophyly of Merremieae confidently. Given the lack of clarity regarding its status, they tentatively recognized the tribe in their phylogenetic classification of the family (Stefanovic *et al.*, 2003) pending further research. Significantly, they noted that the morphological characterization of the tribe was also problematic (Stefanovic *et al.*, 2003).

The present study, with expanded taxon sampling and additional markers, supports the paraphyly of Merremieae *sensu* Stefanovic *et al.* (2003) relative to Ipomoeae (Fig. 1) whereas the relationship of Merremieae with Convolvuleae remains less clear.

Merremieae is resolved in the Convolvuloideae clade of Stefanovic *et al.* (2003), which also comprises Ipomoeae, Convolvuleae and Aniseae (Fig. 1). The clade comprises about two thirds of the species in Convolvulaceae, but lacks a single unifying morphological character (Stefanovic *et al.*, 2003). In this clade, we have not been able to identify morphologi-



cal characters that would allow morphological characterization of Ipomoeae expanded to include *D. montana* (resolved as sister to Ipomoeae) or to also include clades 2 and 3 of Merremieae (resolved as successive sister clades to Ipomoeae + *D. montana*; Fig. 1). Difficulties with the morphological characterization of larger clades suggest that tribal classification may be problematic. At the generic level, however, a re-classification of Merremieae, recognizing monophyletic, morphologically diagnosable groups may be achievable.

#### IMPLICATIONS FOR GENERIC DELIMITATION

In contrast with earlier studies, we sampled representatives of all currently accepted genera of Merremieae. The potential non-monophyly of *Merremia* supported further by this analysis, combined with strong support for certain groups, highlights the need for a re-circumscription of the genus. The relationships of the monotypic *Remirema* are investigated for the first time but it ultimately remains unresolved in our analysis (Fig. 1). This taxon is morphologically quite distinct, possessing a gynobasic style and an uncommon four-nutlet fruit; on the basis of our results, there are no grounds to change the taxonomic status of this monotypic Thai endemic genus.

In the case of *Operculina*, the second largest genus in Merremieae, monophyly may be achieved if *M. maypurensis* is included and *O. flammea* excluded. The operculate fruit is the characteristic that most readily defines *Operculina* and, significantly, this trait is unknown in these two taxa. In light of their placement we predict that *M. maypurensis* possesses an operculate fruit and *O. flammea* does not.

Of the remaining genera, our results indicate that the monotypic genera *Decalobanthus* and *Davenportia* are nested in late branching positions in clades 3 and 4, respectively (Fig. 1), in which they are readily accommodated morphologically. *Xenostegia* is resolved as sister to a clade comprising *M. pinnata* and *M. sapinii* and given the features shared by these taxa, including a distinctive panto-aperturate pollen type (Simões, 2013), a broader circumscription of *Xenostegia* appears to be warranted.

The placement of *Hewittia* and *Hyalocystis*, both of which occur in the Horn of Africa (although *Hewittia* is more widespread), is not well supported, but they appear to be closely related and in a clade with other East African taxa. Although these genera are morphologically distinct, their recognition would leave the problem of how to deal with the other taxa that are resolved in the same clade albeit without support. The clade is centred on East Africa and a more broadly circumscribed genus of East African taxa may be appropriate, even if the monophyly of the clade is equivocal.

*Daustinia montana* (Fig. 1, clade 1) is resolved as sister to *Ipomoea*, albeit with weak support. However, this species is clearly morphologically distinct from *Jacquemontia* (Buril et al., 2014) and is justifiably recognized as the distinct genus *Daustinia* (Buril et al., 2014, 2015).

The well supported groups identified in Figure 1 provide the basis for a revised generic classification since they are monophyletic and morphologically diagnosable (Table 2). We have sampled approximately half of taxa in Merremieae and are confident that the majority of the remainder could be accommodated in one of the six groups recognized. However, some taxa are clearly not referable to the six groups we have recognized; thus, our data are equivocal with regards the status of *Hyalocystis* and *Hewittia*. As already noted, the monotypic status of the unresolved *Remirema* appears justified given its distinctive gynoeceum structure. Our results provide no indication of the placement of *M. caloxantha*, *M. poranoides* or *M. sibirica*. *Merremia caloxantha* is an East Asian endemic that is morphologically similar to a number of other species from East Asia [*M. hungaiensis* (Lingelsh. & Borza) R.C.Fang, *M. yunnanensis* (Couchet & Gagnep.) R.C.Fang, *M. cordata* C.Y.Wu & R.C.Fang]; we were unable to sample those taxa but hypothesize that they would constitute a monophyletic group. *Merremia poranoides* and *M. sibirica* are poorly known and further morphological and molecular data would be desirable for more solid hypotheses of their relationships with the remaining taxa examined.

#### CONCLUSIONS

This study provides the most extensive analysis of Merremieae to date, sampling all recognized genera and approximately half of the c. 120 currently recognized species. Our results fail to ascertain the monophyly of the tribe and we suggest that attempts at tribal delimitation in the Convolvuloideae clade to which it belongs are likely to be problematic. At the generic level, we have identified several morphologically diagnosable monophyletic groups in Merremieae that provide a clear framework for a new generic classification based on the criteria of monophyly and diagnosability. Some of these groups broadly correspond to currently recognized genera with minor modifications (e.g. clade 5 – *Xenostegia*; clade 6 – *Operculina*). Basal relationships remain poorly resolved and a number of taxa are not readily accommodated by these groups because they are unresolved in the analysis. In some cases these represent morphologically divergent lineages (e.g. *Remirema*) that warrant recognition.

## ACKNOWLEDGEMENTS

The first author acknowledges Fundação Ciência e Tecnologia for financial support (Grant SFRH/BD/45924/2008). We gratefully acknowledge the collaboration of George Staples throughout this study and the advice of Rosângela Simão-Bianchini and Saša Stefanović. Also, Finlay Maguire (Natural History Museum of London) for support with the phylogenetic analyses. The encouragement of the late Daniel Austin, Dick Brummitt and Bob Johnson, with whom we are unfortunately unable to share these results, is gratefully acknowledged. Maria Teresa Buril (Universidade Federal Rural de Pernambuco), Javier Luna (University of Edinburgh) and Nelly Bouilhac (Collection Nationale des Convolvulacées) are thanked for their active collaboration in this project. The authors would also like to acknowledge the support of staff in the molecular facilities at the Natural History Museum and the curators at A, AIGH, BM, BRI, L, LISC and MO for facilitating specimen study and collection of samples.

## REFERENCES

- Akaike H.** 1974. A new look at the statistical model identification. *IEEE Transactions on Automatic Control* **19**: 716–723.
- Austin DF.** 1982. Convolvulaceae. In: de Febres ZL, Steyermark JA, eds. *Flora of Venezuela* 8 (3): 16. Caracas: Instituto Nacional de Parques, Ediciones Función Educación Ambiental.
- Austin DF.** 1998. Parallel and convergent evolution in the Convolvulaceae. In: Mathew P, Sivadasan M, eds. *Diversity and taxonomy of tropical flowering plants*. Calicut: Mentor Books, 201–234.
- Ayres DL, Darling A, Zwickl DJ, Beerli P, Holder MT, Lewis PO, Huelsenbeck JP, Ronquist F, Swofford DL, Cummings MP, Rambaut A, Suchard MA.** 2012. BEAGLE: an application programming interface and high-performance computing library for statistical phylogenetics. *Systematic Biology* **61**: 170–173.
- Brummitt RK, Staples GW.** 2007. Convolvulaceae. In: Heywood VH, Brummitt RK, Culham A, Seberg O, eds. *Flowering plant families of the World*. Kew: Royal Botanic Gardens.
- Buril MT.** 2013. *Sistemática e filogenia de Jacquemontia Choisy (Convolv)*, *Sistemática e filogenia de Jacquemontia Choisy (Convolv)*. Unpublished D. Phil. thesis, Universidade Federal de Pernambuco, Brasil.
- Buril MT, Simões AR, Carine M, Alves M.** 2014. *Austinia*, a new genus of Convolvulaceae from Brazil. *Phytotaxa* **186**: 254–260.
- Buril MT, Simões AR, Carine M, Alves M.** 2015. *Dustinia*, a replacement name for *Austinia* (Convolvulaceae). *Phytotaxa* (in press). doi: <http://dx.doi.org/10.11646/phytotaxa.197.1.8>
- Carine MA, Russell SJ, Santos-Guerra A, Francisco-Ortega J.** 2004. Relationships of the Macaronesian and Mediterranean floras: molecular evidence for multiple colonizations into Macaronesia and back-colonization of the continent in *Convolvulus* (Convolvulaceae). *American Journal of Botany* **91**: 1070–1085.
- Degnan JH, Rosenberg NA.** 2009. Gene tree discordance, phylogenetic inference and the multispecies coalescent. *Trends in Ecology and Evolution* **24**: 332–340.
- Demissew S.** 2001. A synopsis of the genus *Merremia* (Convolvulaceae) in the Flora of Ethiopia and Eritrea. *Kew Bulletin* **56**: 931–934.
- Doyle JJ, Doyle JL.** 1987. A rapid DNA isolation procedure for small quantities of fresh leaf tissue. *Phytochemical Bulletin, Botanical Society of America* **19**: 11–15.
- Edwards SV.** 2009. Is a new and general theory of molecular systematics emerging? *Evolution* **63**: 1–19.
- Fang RC, Staples GW.** 1995. Convolvulaceae. In: Wu ZY, Raven PH, eds. *Flora of China*, Vol. 16. Beijing: Science Press.
- Farris JS, Källersjö M, Kluge AG, Bult C.** 1994. Testing significance of congruence. *Cladistics* **10**: 315–319.
- Felsenstein J.** 1985. Confidence limits on phylogenies: an approach using the bootstrap. *Evolution* **39**: 783–791.
- Gonçalves ML.** 1987. Convolvulaceae. In: Launert E, ed. *Flora Zambesiaca*. London: Flora Zambesiaca Managing Committee.
- Hall T.** 1999. BioEdit: a user-friendly biological sequence alignment editor and analysis program for Windows 95/98/NT. *Nucleic Acids Symposium Series* **41**: 95–98.
- Heine H.** 1963. Convolvulaceae. In: Hutchinson J, Dalziel JM, eds. *Flora of West Tropical Africa*, Vol. 2. Kew: Royal Botanic Gardens, 340–342.
- Hollingsworth PM, Forrest LL, Spouge JL, Hajibabaei M, Ratnasingham S, van der Bank M, Chase MW, Cowan RS, Erickson DL, Fazekas AJ, Graham SW, James KE, Kim K-J, Kress WJ, Schneider H, van AlphenStahl J, Barrett CHS, van den Berg C, Bogarin D, Burgess KS, Cameron KM, Carine M, Chacón J, Clark A, Clarkson JJ, Conrad F, Devey DS, Ford CS, Hedderson TAJ, Hollingsworth ML, Husband BC, Kelly LJ, Kesnakurti PR, Kim JS, Kim Y-D, Lahaye R, Lee H-L, Long DG, Madriñán S, Maurin O, Meusnier I, Newmaster SG, Park CW, Percy DM, Petersen G, Richardson JE, Salazar GA, Savolainen V, Seberg O, Wilkinson MJ, Yi DK, Little DP.** 2009. A DNA barcode for land plants. *Proceedings of the National Academy of Sciences of the United States of America* **106**: 12794–12797.
- Jayasuriya KMG, Baskin JM, Geneve RL, Baskin CC.** 2009. Phylogeny of seed dormancy in Convolvulaceae, subfamily Convolvuloideae (Solanales). *Annals of Botany* **103**: 45–63.
- Johnson B.** 2010. *Davenportia* R. W. Johnson, a new genus of Convolvulaceae (Merremieae) from central Australia. *Austrobaileya* **8**: 171–175.
- Johnson RW.** 2009. A conspectus of *Merremia* Dennst. ex Endl. (Convolvulaceae) in Australia with the addition of two species. *Austrobaileya* **8**: 55–63.

- Keane TM, Creevey CJ, Pentony MM, Naughton TJ, McInerney JO. 2006.** Assessment of methods for amino acid matrix selection and their use on empirical data shows that *ad hoc* assumptions for choice of matrix are not justified. *BMC Evolutionary Biology* **6**: 29.
- Maddison WP, Knowles LL. 2006.** Inferring phylogeny despite incomplete lineage sorting. *Systematic Biology* **55**: 21–30.
- Manos PS, Miller RE, Wilkin P. 2001.** Phylogenetic analysis of *Ipomoea*, *Argyrea*, *Stictocardia*, and *Turbina* suggests a generalized model of morphological evolution in morning glories. *Systematic Botany* **26**: 585–602.
- Meuse ADJ, Welman WG. 2000.** Convolvulaceae. In: Germishuizen & Plessis, eds. *Flora of Southern Africa*, Vol. 28, Issue 1. Pretoria: National Botanical Institute.
- Miller MA, Pfeiffer W, Schwartz T. 2010.** Creating the CIPRES Science Gateway for inference of large phylogenetic trees, Proceedings of the Gateway Computing Environments Workshop (GCE), New Orleans, LA: 1–8.
- Miller RE, Buckley TR, Manos PS. 2002.** An examination of the monophyly of morning glory taxa using Bayesian phylogenetic inference. *Systematic Biology* **52**: 740–753.
- Nixon KC. 2002.** WinClada ver. 1.00.08. Published by the author, Ithaca, NY.
- O'Donnell C. 1941.** Revisión de las especies americanas de *Merremia* (Convolvulaceae). *Lilloa* **6**: 467–541.
- Rambaut A. 2012.** FigTree version 1.4.0. Available at: <http://tree.bio.ed.ac.uk/software/figtree>
- Rambaut A, Drummond AJ. 2009.** Tracer version 1.5. Available at: <http://beast.bio.ed.ac.uk>
- Ronquist F, Huelsenbeck JP. 2003.** MRBAYES 3: Bayesian phylogenetic inference under mixed models. *Bioinformatics (Oxford, England)* **19**: 1572–1574.
- Shaw J, Lickey EB, Schilling EE, Small RL. 2007.** Comparison of whole chloroplast genome sequences to choose noncoding regions for phylogenetic studies in angiosperms: the tortoise and the hare III. *American Journal of Botany* **94**: 275–288.
- Simões AR. 2013.** Disentangling the bindweeds: systematics and evolution of Tribe Merremieae (Convolvulaceae). PhD thesis, University of Reading, UK.
- Staples GW. 2010.** A checklist of *Merremia* (Convolvulaceae) in Australasia and the Pacific. *Gardens' Bulletin Singapore* **61**: 483–522.
- Stefanovic S, Austin DF, Olmstead RG. 2003.** Classification of Convolvulaceae: a phylogenetic approach. *Systematic Botany* **28**: 791–806.
- Stefanovic S, Krueger L, Olmstead RG. 2002.** Monophyly of the Convolvulaceae and circumscription of their major lineages based on DNA sequences of multiple chloroplast loci. *American Journal of Botany* **89**: 1510–1522.
- Stefanovic S, Olmstead RG. 2004.** Testing the phylogenetic position of a parasitic plant (*Cuscuta*, Convolvulaceae, Asteridae): Bayesian inference and the parametric bootstrap on data drawn from three genomes. *Systematic Biology* **53**: 384–399.
- Swofford DL. 2001.** PAUP\*. Sinauer Associates.
- Thulin M. 2006.** Convolvulaceae. In: Thulin M, ed. *Flora of Somalia*, Vol. 3. Kew: Royal Botanic Gardens, 241.
- Verdcourt B. 1963.** Convolvulaceae. In: Hubbard CE, Milne-Redhead E, eds. *Flora of Tropical East Africa*. Kew: Royal Botanic Gardens.
- Van Oostroom SJ, Hoogland RD. 1953.** Convolvulaceae. In: Van Steenis CGGJ, ed. *Convolvulaceae*. Leiden/Jakarta: Noordhogg-Kolff N. V. Djakarta, 388–512.
- Wilkin P. 1999.** A morphological cladistic analysis of the Ipomoeae. *Kew Bulletin* **54**: 853–876.
- Yang Z. 1994.** Estimating the pattern of nucleotide substitution. *Journal of Molecular Evolution* **39**: 105–111.

## APPENDIX

## VOUCHER INFORMATION AND GENBANK ACCESSION NUMBERS FOR TAXA USED IN THIS STUDY

| Species                                                                  | Locality                         | Voucher specimen                                                  | ITS      | <i>trnL-trnF</i> | <i>matK</i> | <i>rps16</i> |
|--------------------------------------------------------------------------|----------------------------------|-------------------------------------------------------------------|----------|------------------|-------------|--------------|
| <i>Aniseia martinicensis</i> (Jacq.)<br>Choisy                           | Malaysia                         | FRI 70036 (KEP)                                                   | KP261943 | KP236600         | KR024890    | KR025033     |
| <i>Aniseia martinicensis</i> (Jacq.)<br>Choisy                           | C.N.C. (cultivation)             | Simões 65 (BM)                                                    | KP261944 | KP236601         | KR024891    | KR025034     |
| <i>Argyreia caudata</i> Ooststr.                                         | Malaysia                         | SAN 152877 (SAN)                                                  | KP261908 | KP236602         | KR024892    | KR025035     |
| <i>Argyreia erinacea</i> Ooststr.                                        | Malaysia                         | SAN 152883 (SAN)                                                  | –        | KP236603         | KR024893    | KR025036     |
| <i>Argyreia henryi</i> Craib                                             | Thailand                         | Staples 1424 (SAN)                                                | KP261910 | KP236605         | KR024895    | KR025038     |
| <i>Argyreia laotica</i> Gagnep.                                          | Thailand                         | Staples 1390 (SING)                                               | KP261911 | KP236606         | KR024896    | KR025039     |
| <i>Argyreia mollis</i> (Burm.f.) Choisy                                  | Thailand                         | Staples 1391 (SING)                                               | KP261912 | KP236607         | KR024897    | KR025040     |
| <i>Argyreia nervosa</i> (Burm.f.) Bojer                                  | SBG (cultivation)                | SBG 20031385 (SING)                                               | KP261913 | KP236608         | KR024898    | KR025041     |
| <i>Argyreia siamensis</i> (Craib) Staples                                | Thailand                         | Staples 1412 (SING)                                               | KP261914 | KP236609         | KR024899    | KR025042     |
| <i>Convolvulus althaeoides</i> L.                                        | Spain                            | Carine 164 (BM)                                                   | KC528819 | –                | KC529015    | –            |
| <i>Convolvulus arvensis</i> L.                                           | Turkey                           | Davis & Hedge 30675 (BM)                                          | KC528906 | –                | KC529020    | –            |
| <i>Convolvulus sepium</i> L. var.<br><i>americanus</i> Sims              | Portugal                         | Carine 50 (BM)                                                    | KC528910 | –                | KC529150    | –            |
| <i>Convolvulus tricolor</i> L.                                           | Morocco                          | Carine 250 (BM)                                                   | KC528870 | –                | KC529131    | –            |
| <i>Convolvulus siculus</i> L.                                            | Spain                            | Carine 231 (BM)                                                   | KC528899 | –                | KC529121    | –            |
| <i>Convolvulus valentinus</i> Cav.                                       | Morocco                          | Carine 327 (BM)                                                   | KC528902 | –                | KC529133    | –            |
| <i>Convolvulus caput-medusae</i> Lowe                                    | Spain                            | Carine & Duraes 158 (BM)                                          | KC528951 | –                | KC529028    | –            |
| <i>Convolvulus capituliferus</i> Franch.<br>var. <i>foliaceus</i> Verde. | Ethiopia                         | Ensermu et al. 3679 (ETH)                                         | KP261946 | –                | –           | –            |
| <i>Convolvulus</i> × <i>despreauxii</i><br>A.Santos & Carine             | CNC (cultivation)                | Simoes 5 (BM)                                                     | KP261947 | –                | KR024902    | KR025043     |
| <i>Convolvulus farinosus</i> L.                                          | Ethiopia                         | Sebsebe, D. 2967 (ETH)                                            | KP261948 | –                | KR024903    | KR025044     |
| <i>Davenportia davenportii</i> (F.Muell.)<br>R.W.Johnson                 | Australia                        | Bean, A. R. 23827 (BRI)                                           | KP261966 | KP236610         |             | KR025045     |
| <i>Decalobanthus sumatranus</i><br>Ooststr.                              | Malaysia                         | Amb. & Arifin 1682 (L)                                            | KP261986 | KP236611         | KR024904    | KR025045     |
| <i>Hewittia malabarica</i> (L.) Suresh<br>(1)                            | Thailand                         | Staples 1334 (BM)                                                 | KP261950 | KP236613         | KR024909    | KR025047     |
| <i>Hewittia malabarica</i> (L.) Suresh<br>(2)                            | CNC (cultivation;<br>Tanzania)   | Simoes 2 (BM)                                                     | KP261951 | KP236615         | KR024910    | KR025048     |
| <i>Hyalocystis viscosa</i> Hallier f.                                    | Somalia                          | Bally & Melville 15536 (MO)                                       | –        | –                | KR024911    |              |
| <i>Ipomoea aquatica</i> Forssk.                                          | Malaysia                         | FRI 70037 (FRIM)                                                  | KP261915 | KP236616         | KR024912    | KR025049     |
| <i>Ipomoea cairica</i> (L.) Sweet                                        | USA, Hawaii                      | Staples 1399 (SING)                                               | KP261916 | KP236618         |             | KR025051     |
| <i>Ipomoea carnea</i> Jacq.                                              | Singapore (cultivation)          | SBG 19971190 (SING)                                               | KP261917 | KP236619         | KR024914    | KR025052     |
| <i>Ipomoea cicatricosa</i> Baker                                         | Ethiopia                         | Sebsebe D, M, Carine, A, Simoes,<br>Wege A. & Ermias G. 6967 (BM) | KP261918 | KP236620         | KR024915    | KR025053     |
| <i>Ipomoea cordatotriloba</i> Dennst.                                    | USA, Florida                     | Staples 1465 (SING)                                               | KP261919 | KP236621         | KR024916    | KR025054     |
| <i>Ipomoea donaldsonii</i> Rendle                                        | Ethiopia                         | Sebsebe D, M, Carine, A, Simoes,<br>Wege A. & Ermias G. 6942 (BM) | KP261920 | KP236622         | KR024917    | KR025055     |
| <i>Ipomoea indica</i> Merr.                                              | USA, Hawaii                      | Staples 1397 (SING)                                               | KP261921 | KP236625         | KR024921    | KR025058     |
| <i>Ipomoea intrapilosa</i> Rose                                          | CNC (cultivation,<br>Mexico)     | Simoes 52 (BM)                                                    | KP261922 | KP236626         | KR024922    | KR025059     |
| <i>Ipomoea kituiensis</i> Vatke var.<br><i>kituiensis</i>                | Ethiopia                         | Sebsebe D, M, Carine, A, Simoes,<br>Wege A. & Ermias G. 6958 (BM) | KP261923 | KP236627         | KR024923    | KR025060     |
| <i>Ipomoea littoralis</i> Blume                                          | Malaysia                         | SAN 152892 (SAN)                                                  | KP261924 | KP236628         | KR024924    | KR025061     |
| <i>Ipomoea marmorata</i> Britten &<br>Rendle subsp. <i>marmorata</i>     | Ethiopia                         | Sebsebe D, M, Carine, A, Simoes,<br>Wege A. & Ermias G. 6939 (BM) | KP261925 | –                | KR024925    | KR025062     |
| <i>Ipomoea mauritiana</i> Jacq.                                          | CNC (cultivation,<br>France)     | Simoes 48 (BM)                                                    | KP261926 | KP236629         | KR024926    | KR025063     |
| <i>Ipomoea ochracea</i> (Lindl.) G.Don                                   | Thailand                         | Staples 1396 (SING)                                               | KP261927 | KP236631         | KR024928    | KR025065     |
| <i>Ipomoea pes-tigridis</i> L.                                           | Singapore (cultivation)          | SBG 20100015 (SING)                                               | KP261928 | KP236632         | KR024929    | KR025066     |
| <i>Ipomoea pileata</i> Roxb.                                             | Thailand                         | Staples 1449 (SING)                                               | KP261929 | KP236633         | KR024930    | KR025067     |
| <i>Ipomoea pogonantha</i> Thulin                                         | Ethiopia                         | Sebsebe D, M, Carine, A, Simoes,<br>Wege A. & Ermias G. 6937 (BM) | KP261930 | KP236634         | KR024931    | KR025068     |
| <i>Ipomoea polymorpha</i> Schult.                                        | Ethiopia                         | Sebsebe D, M, Carine, A, Simoes,<br>Wege A. & Ermias G. 6961 (BM) | KP261931 | KP236635         | KR024932    | –            |
| <i>Ipomoea purpurea</i> (L.) Roth                                        | CNC (cultivation,<br>Madagascar) | Simoes 50 (BM)                                                    | KP261932 | KP236636         | KR024933    | KR025070     |
| <i>Ipomoea quamoclit</i> L.                                              | Singapore (cultivation)          | SBG 20080990 (SING)                                               | KP261933 | KP236637         | KR024934    | KR025071     |
| <i>Ipomoea sagittifolia</i> Burm.f.                                      | Malaysia                         | FRI 7036 (FRIM)                                                   | KP261934 | KP236638         | KR024935    | KR025072     |
| <i>Ipomoea sinensis</i> (Desr.) Choisy                                   | Ethiopia                         | Sebsebe D, M, Carine, A, Simoes,<br>Wege A. & Ermias G. 6920 (BM) | KP261935 | KP236639         | KR024936    | KR025073     |
| <i>Ipomoea tricolor</i> Cav.                                             | Singapore                        | Simoes 19 (BM)                                                    | KP261936 | KP236640         | KR024937    | KR025074     |
| <i>Ipomoea violacea</i> L.                                               | Malaysia                         | FRI 70039 (FRIM)                                                  | KP261937 | KP236641         | KR024938    | KR025075     |

APPENDIX *Continued*

| Species                                                                           | Locality                        | Voucher specimen                                                          | ITS      | <i>trnL-trnF</i> | <i>matK</i> | <i>rps16</i> |
|-----------------------------------------------------------------------------------|---------------------------------|---------------------------------------------------------------------------|----------|------------------|-------------|--------------|
| <i>Iseia luxurians</i> (Moric.) O'Donell                                          | CNC (cultivation, Madagascar)   | <i>Simoes 66</i> (BM)                                                     | KP261945 | KP236642         | KR024939    | KR025076     |
| <i>Lepistemon binectariferum</i> (Wall.) Kuntze                                   | Malaysia                        | <i>FRI 66675</i> (FRIM)                                                   | KP261938 | –                | KR024940    | KR025077     |
| <i>Merremia aegyptia</i> (L.) Urb.                                                | CNC (cultivation, Senegal)      | <i>Simoes 17</i> (BM)                                                     | KP261965 | KP236643         | KR024941    | KR025078     |
| <i>Merremia ampelophylla</i> Hallier f. (1)                                       | Kenya                           | <i>Festo et al. 2645</i> (K)                                              | KP261972 | KP236645         | KR024943    | KR025079     |
| <i>Merrmia ampelophylla</i> Hallier f. (2)                                        | Ethiopia                        | <i>Sebsebe D, M, Carine, A, Simoes, Wege A. &amp; Ermias G. 6971</i> (BM) | KP261969 | KP236644         | KR024942    | –            |
| <i>Merremia aturensis</i> Hallier f.                                              | Brazil                          | <i>Whitefoord 2330</i> (BM)                                               | KP261974 | KP236646         | –           | –            |
| <i>Merremia aurea</i> (Kellogg) O'Donell                                          | Mexico                          | <i>Wiggins 5591</i> (A)                                                   | KP261975 | –                | KR024944    | –            |
| <i>Merremia austinii</i> J.A.McDonald                                             | Mexico                          | <i>McDonald s.n.</i> (BM)                                                 | KP261983 | –                | KR024945    | KR025080     |
| <i>Merremia borneensis</i> Merr. (1)                                              | Malaysia                        | <i>FRI s.n.</i> (FRIM)                                                    | KP261984 | KP236648         | KR024948    | KR025082     |
| <i>Merremia borneensis</i> Merr. (2)                                              | Malaysia                        | <i>SAN 152852</i> (SAN)                                                   | KP261985 | KP236650         | KR024950    | –            |
| <i>Merremia caloxantha</i> (Diels) Staples & R.C.Fang                             | China                           | <i>G. Goligong Shan Exp. (GSE97) 9928</i>                                 | KP262006 | KP236649         | KR024949    | –            |
| <i>Merremia cielensis</i> J.A.McDonald                                            | Mexico                          | <i>McDonald s.n.</i> (BM)                                                 | KP261976 | KP236651         | –           | KR025085     |
| <i>Merremia cissoides</i> Hallier f.                                              | Thailand                        | <i>Staples 1318</i> (BM)                                                  | KP261977 | KP236652         | KR024951    | KR025086     |
| <i>Merremia dimorphophylla</i> (Verdc.) Sebsebe subsp. <i>ogadenensis</i> Sebsebe | Ethiopia                        | <i>Ensermu &amp; Wondafrash 2816</i> (ETH)                                | KP261978 | KP236654         | KR024953    | KR025087     |
| <i>Merremia dissecta</i> (Jacq.) Hallier f.                                       | CNC (cultivation, Guyane)       | <i>Simoes 6</i> (BM)                                                      | KP261981 | KP236656         | KR024956    | KR025090     |
| <i>Merremia dissecta</i> Hallier f. var. <i>edentata</i> (Meisn.) O'Donell        | Brazil                          | <i>Nee &amp; Chavez 48899</i> (MO)                                        | KP261982 | KP236657         | KR024957    | KR025091     |
| <i>Merremia emarginata</i> Hallier f.                                             | Thailand                        | <i>Staples 1335</i> (BM)                                                  | KP261993 | KP236659         | KR024958    | KR025092     |
| <i>Merremia gallabatensis</i> Hallier f.                                          | Ethiopia                        | <i>Demissew, Wondafrash, Awas &amp; Kagnew 6091</i> (ETH)                 | KP261949 | KP236660         | KR024959    | KR025093     |
| <i>Merremia gemella</i> (Choisy) Hallier f.                                       | Thailand                        | <i>Staples 1333</i> (BM)                                                  | KP261994 | KP236661         | KR024960    | KR025094     |
| <i>Merremia guerichii</i> A.Meeuse                                                | CNC (cultivation, Namibia)      | <i>Simoes 44</i> (BM)                                                     | KP261979 | KP236662         | KR024962    | KR025096     |
| <i>Merremia hederacea</i> Hallier f.                                              | Thailand                        | <i>Simoes 26</i> (BM)                                                     | KP261995 | KP236664         | KR024964    | KR025098     |
| <i>Merremia hirta</i> Merr.                                                       | Cambodia                        | <i>Simoes 44</i> (BM)                                                     | KP261996 | KP236665         | KR024965    | KR025099     |
| <i>Merremia incisa</i> (R.Br.) Hallier f.                                         | Australia                       | <i>Courie, 1234b</i> (BRI)                                                | KP261997 | KP236667         | KR024967    | KR025101     |
| <i>Merremia kentrocaulos</i> Rendle                                               | CNC (cultivation, South Africa) | <i>Simoes 9</i> (BM)                                                      | KP261998 | KP236668         | KR024968    | KR025102     |
| <i>Merremia mammosa</i> (Lour.) Hallier f.                                        | Thailand                        | <i>Staples 1351</i> (BM)                                                  | KP261987 | –                | KR024972    | KR025104     |
| <i>Merremia maypurensis</i> Hallier f.                                            | Venezuela                       | <i>Groger &amp; Llamozas 1145</i> (MO)                                    | –        | KP236673         | KR024973    | KR025105     |
| <i>Merremia peltata</i> (L.) Merr. (1)                                            | Malaysia                        | <i>SAN 152853</i> (SAN)                                                   | KP261988 | KP236676         | KR024976    | KR025107     |
| <i>Merremia peltata</i> (L.) Merr. (2)                                            | Malaysia                        | <i>SAN 152851</i> (SAN)                                                   | KP261989 | KP236677         | KR024977    | KR025108     |
| <i>Merremia pinnata</i> Hallier f.                                                | CNC (cultivation)               | <i>Simoes 15</i> (BM)                                                     | KP261959 | KP236678         | KR024978    | KR025109     |
| <i>Merremia poranoides</i> (C.B.Clarke) Hallier f.                                | Malaysia                        | <i>Staples 1441</i> (SING)                                                | KP262005 | KP236680         | KR024979    | KR025110     |
| <i>Merremia pterygocaulos</i> Hallier f.                                          | CNC (cultivation, Madagascar)   | <i>Simoes 64</i> (BM)                                                     | KP261999 | KP236681         | KR024980    | KR025111     |
| <i>Merremia quinata</i> (R.Br.) Ooststr. (1)                                      | Thailand                        | <i>Staples 1347</i> (BM)                                                  | KP262001 | KP236682         | KR024982    | KR025112     |
| <i>Merremia quinata</i> (R.Br.) Ooststr. (2)                                      | Australia                       | <i>K. R. McDonald KRM 3270</i> (BRI)                                      | KP262002 | KP236683         | KR024983    | KR025113     |
| <i>Merremia quinquefolia</i> Hallier f.                                           | CNC (cultivation)               | <i>Simoes 10</i> (BM)                                                     | KP262003 | KP236684         | KR024984    | KR025114     |
| <i>Merremia sapinii</i> De Wild. (1)                                              | Congo, D. R. C.                 | <i>Breyne 3197</i> (BR)                                                   | –        | KP236685         | –           | –            |
| <i>Merremia sapinii</i> De Wild. (2)                                              | Congo, D. R. C.                 | <i>Pauwels 2991</i> (BR)                                                  | –        | –                | KR024985    | –            |
| <i>Merremia semisagitta</i> (Griseb. ex Peter) Dandy                              | s. l.                           | <i>Popov 69154</i> (BM)                                                   | KP261970 | KP236687         | KR024986    | –            |
| <i>Merremia sibirica</i> Hallier f.                                               | China                           | <i>Forrest 11314</i> (BM)                                                 | KP262004 | KP236688         | KR024987    | –            |
| <i>Merremia somalensis</i> Hallier f.                                             | Ethiopia                        | <i>Thesiger s.n.</i> (BM)                                                 | KP261971 | KP236689         | KR024988    | –            |
| <i>Merremia subsessilis</i> (Courchet & Gagnep.) P.H.Ho                           | Malaysia                        | <i>Staples 1456</i> (SING)                                                | KP261990 | –                | KR024990    | –            |
| <i>Merremia thorelii</i> (Gagnep.) Staples                                        | Thailand                        | <i>Staples 1324</i> (BM)                                                  | –        | KP236691         | KR024991    | KR025117     |
| <i>Merremia tuberosa</i> Rendle (1)                                               | CNC (cultivation, Guadeloupe)   | <i>Simoes 4</i> (BM)                                                      | KP261967 | KP236692         | –           | KR025118     |
| <i>Merremia tuberosa</i> Rendle (2)                                               | Australia                       | <i>Waterhouse et al. BMW 5044</i> (BRI)                                   | KP261968 | KP236693         | KR024992    | KR025119     |
| <i>Merremia umbellata</i> (L.) Hallier f. (1)                                     | Thailand                        | <i>Staples 1329</i> (BM)                                                  | KP261960 | KP236696         | KR024946    | KR025081     |

APPENDIX *Continued*

| Species                                                                                                | Locality                         | Voucher specimen                                | ITS      | <i>trnL-trnF</i> | <i>matK</i> | <i>rps16</i> |
|--------------------------------------------------------------------------------------------------------|----------------------------------|-------------------------------------------------|----------|------------------|-------------|--------------|
| <i>Merremia umbellata</i> (L.) Hallier f. (2)                                                          | Thailand                         | <i>Staples 1369</i> (BM)                        | KP261963 | KP236696         | KR024995    | KR025122     |
| <i>Merremia umbellata</i> (L.) Hallier f. (3)                                                          | Malaysia                         | <i>FRI 70028</i> (FRIM)                         | KP261962 | KP236694         | KR024993    | KR025120     |
| <i>Merremia umbellata</i> (L.) Hallier f. (4)                                                          | Cambodia                         | <i>Simoës 28</i> (BM)                           | KP261961 | –                | KR024947    | –            |
| <i>Merremia verruculosa</i> S.Y.Liu                                                                    | Thailand                         | <i>Staples 1320</i> (BM)                        | KP261991 | KP236700         | KR024999    | KR025125     |
| <i>Merremia vitifolia</i> Hallier f.                                                                   | Thailand                         | <i>Staples 1330</i> (BM)                        | KP261964 | KP236701         | KR0245000   | –            |
| <i>Merremia xanthophylla</i> Hallier f.                                                                | s. l.                            | <i>Smith 437</i> (MO)                           | KP261973 | KP236702         | KR0245001   | KR025126     |
| <i>Operculina aequisejala</i> (Domin)<br>R.W.Johnson                                                   | CNC (cultivation,<br>Australia)  | <i>Simoës 14</i> (BM)                           | KP262008 | KP236703         | KR0245003   | KR025127     |
| <i>Operculina codonantha</i> Hallier f.                                                                | CNC (cultivation,<br>Ecuador)    | <i>Simoës 8</i> (BM)                            | KP262009 | KP236705         | KR0245005   | –            |
| <i>Operculina flammea</i> Meisn.                                                                       | Brasil                           | <i>Carvalho-Sobrinho, J. G. 3017</i><br>(HUEFS) | KP262010 | KP236706         | KR0245006   | –            |
| <i>Operculina hamiltonii</i> (G.Don.)<br>D.F. Austin & Staples                                         | CNC (cultivation,<br>Panama)     | <i>Simoës 59</i> (BM)                           | KP262011 | KP236707         | KR0245007   | KR025129     |
| <i>Operculina petaloidea</i> (Choisy)<br>Ooststr.                                                      | Thailand                         | <i>Staples 1372</i> (BM)                        | KP262012 | KP236708         | KR0245009   | –            |
| <i>Operculina pinnatifida</i> (Kunth)<br>O'Donell                                                      | –                                | <i>Dwyer 1455</i> (BM)                          | KP262013 | KP236709         | KR0245010   | KR025130     |
| <i>Operculina pteripes</i> (G.Don)<br>O'Donell                                                         | –                                | <i>Wiggins &amp; Rollins 398</i> (A)            | –        | KP236710         | KR0245011   | –            |
| <i>Operculina riedeliana</i> (Oliver)<br>Ooststr.                                                      | Singapore (cultivation)          | <i>Staples 1469</i> (SING)                      | KP262014 | KP236712         | KR0245012   | KR025131     |
| <i>Operculina sericantha</i> (Miq.)<br>Ooststr.                                                        | –                                | <i>Evans et al. 2695</i> (MO)                   | –        | KP236713         | KR0245014   | –            |
| <i>Operculina turpethum</i> (L.) Silva<br>Manso (1)                                                    | CNC (cultivation)                | <i>Simoës 18</i> (BM)                           | KP262015 | KP236714         | KR0245015   | KR025133     |
| <i>Operculina turpethum</i> (L.) Silva<br>Manso (2)                                                    | Malaysia                         | <i>SAN 152888</i> (SAN)                         | KP262016 | KP236715         | KR0245016   | KR025134     |
| <i>Remirema bracteata</i> Kerr                                                                         | Thailand                         | <i>Staples 1338</i> (BM)                        | KP262007 | KP236716         | KR0245018   | KR025135     |
| <i>Stictocardia beraviensis</i> Hallier f.                                                             | CNC (cultivation,<br>Madagascar) | <i>Simoës 62</i> (BM)                           | KP261939 | KP236717         | KR0245019   | KR025136     |
| <i>Stictocardia laxiflora</i> (Baker)<br>Hallier f.                                                    | CNC (cultivation,<br>Uganda)     | <i>Simoës 49</i> (BM)                           | KP261940 | KP236718         | KR0245020   | KR025137     |
| <i>Stictocardia tiliifolia</i> (Desr.)<br>Hallier f.                                                   | USA, Hawaii                      | <i>Staples 1400</i> (SING)                      | KP261941 | KP236719         | KR0245021   | KR025138     |
| <i>Turbina inopinata</i> Heine                                                                         | CNC (cultivation,<br>France)     | <i>Simoës 57</i> (BM)                           | KP261942 | KP236720         | KR0245022   | KR025139     |
| <i>Xenostegia tridentata</i> (L.) D.F.<br>Austin & Staples subsp.<br><i>tridentata</i> (1)             | Ghana                            | <i>Merello et al. 1581</i> (BM)                 | KP261952 | KP236723         | KR0245024   | KR025140     |
| <i>Xenostegia tridentata</i> (L.) D.F.<br>Austin & Staples subsp.<br><i>tridentata</i> (2)             | CNC (cultivation,<br>Senegal)    | <i>Simoës 16</i> (BM)                           | KP261958 | –                | KR0245031   | KR025150     |
| <i>Xenostegia tridentata</i> (L.) D.F.<br>Austin & Staples subsp. <i>hastata</i><br>(Desr.) P.H.Hô (1) | Malaysia                         | <i>FRI 70040</i> (FRIM)                         | KP261953 | KP236725         | –           | KR025142     |
| <i>Xenostegia tridentata</i> (L.) D.F.<br>Austin & Staples subsp. <i>hastata</i><br>(Desr.) P.H.Hô (2) | Malaysia                         | <i>FRI 70029</i> (FRIM)                         | –        | KP236729         | KR0245028   | KR025146     |
| <i>Xenostegia tridentata</i> (L.) D. F.<br>Austin & Staples subsp.<br><i>hastata</i> (3)               | Singapore                        | <i>Simoës 22</i> (BM)                           | KP261955 | KP236730         | KR0245029   | KR025147     |
| <i>Xenostegia tridentata</i> (L.) D.F.<br>Austin & Staples subsp. <i>hastata</i><br>(Desr.) P.H.Hô (4) | Malaysia                         | <i>FRI 74576a</i> (FRIM)                        | KP261956 | KP236721         | KR0245030   | KR025148     |
| <i>Xenostegia tridentata</i> (L.) D.F.<br>Austin & Staples subsp. <i>hastata</i><br>(Desr.) P.H.Hô (5) | Malaysia                         | <i>FRI 74576b</i> (FRIM)                        | KP261956 | KP236731         | KR0245030   | KR025148     |
| <i>Xenostegia tridentata</i> (L.) D.F.<br>Austin & Staples subsp. <i>hastata</i><br>(Desr.) P.H.Hô (6) | Thailand                         | <i>Staples 1328</i> (BM)                        | –        | KP236728         | KR0245027   | KR025145     |
